# Supplementary material
Source: MDPI journal article supplement (https://www.mdpi.com/2076-3387/10/2/30)
Supplement: s1 [file s1]

**smart  
industry**

**BOOST**

Voor de 200 medewerkers van Aebi Schmidt in Holten staat één vraag centraal bij alles wat ze doen: 'kan het ook anders en (daardoor) beter?'. Het is een non-conformistische bedrijfs-cultuur die van hoog tot laag in de organisatie leeft. Fred Harbers, Directeur Productie, noemt het: "Denken in klantoplossingen in plaats van denken in producten. Voor ons is dát Smart Industry."

## *“Smart gaat niet over producten maar over oplossingen”*

*Aebi Schmidt en Smart Industry*

### **In welke tak van sport is Aebi Schmidt actief?**

"Aebi Schmidt Nederland BV behoort tot de grootste producenten van gladheidbestrijdingsmachines ter wereld. We ontwikkelen en produceren op jaarbasis zo'n 2.000 klantspecifieke strooi- en sproeimachines voor onder meer wegen, fietspaden, pleinen en vliegvelden. Onze opdrachtgevers zijn vooral op zoek naar een totaaloplossing die hen ontzorgt. Uiteindelijk vinden ze een schone, veilige weg in winterse omstandigheden veel belangrijker dan het in bezit hebben van een strooi- en/of sproeimachine. Dat vraagt van ons een compleet andere manier van denken, die als vanzelf leidt naar echt slimme innovaties."

### **Hoe passen jullie Smart Industry toe?**

"Smart Industry gaat natuurlijk over slimme machines en processen die ons in staat stellen sneller, efficiënter en goedkoper te produceren. Maar het gaat vooral ook over innovatieve dienstverlening en over slimme technologieën waarmee we onze klanten nog meer gebruiksgemak kunnen bieden en van een schat aan managementinformatie kunnen voorzien. Zo zijn onze strooiers uitgerust met een controller die actueel inzicht geeft in de performance van de strooimachine via een webapplicatie. Daarnaast kunnen ook alle instellingen zoals strooibreedte, dosering, strooien aan/uit, worden geregistreerd in deze controller. Al deze 'strooidata' worden veilig opgeslagen en direct verstuurd naar een beveiligde dataserver. En hiermee is de strooiactie dus direct online inzichtelijk op laptop, tablet of smartphone. Ook biedt het systeem direct inzicht over het zoutverbruik, de gereden kilometers en gewerkte uren. Een prima basis voor de verrekening met opdrachtgevers."

### **Leeft 'smart' binnen jullie vestiging?**

"Slimme diensten worden bij ons geboren op de werkvloer. Binnen alle internationale Aebi Schmidt locaties heeft onze fabriek in Nederland een voorbeeldrol op het gebied van 'Lean Production'. Het interne programma Fit 4 Tomorrow (F4T) daagt onze medewerkers continu uit na te denken over hoe we nu en in de toekomst competitief kunnen blijven. Dat levert op elk niveau inspirerende ideeën op die we categoriseren en prioriteit geven. Dat kan gaan om bijvoorbeeld slimmere montage-manieren of initiatieven die het energieverbruik verminderen. Alles met als doel samen te werken aan producten en processen die beter, efficiënter, sneller en kosteneffectiever plaatsvinden."

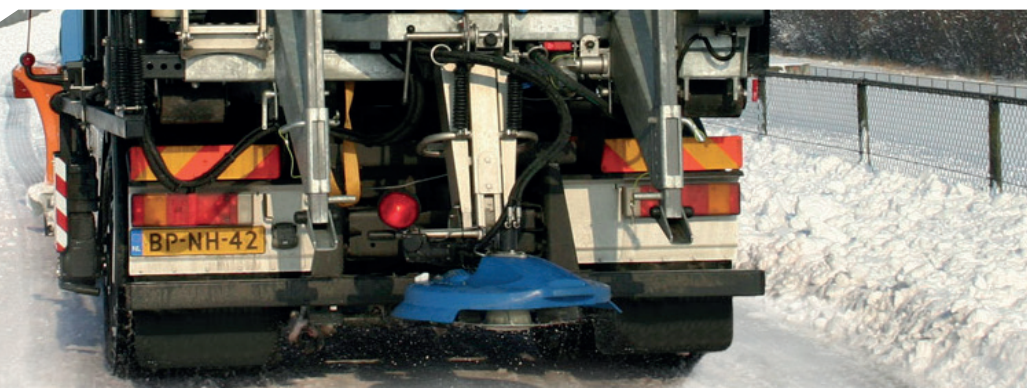

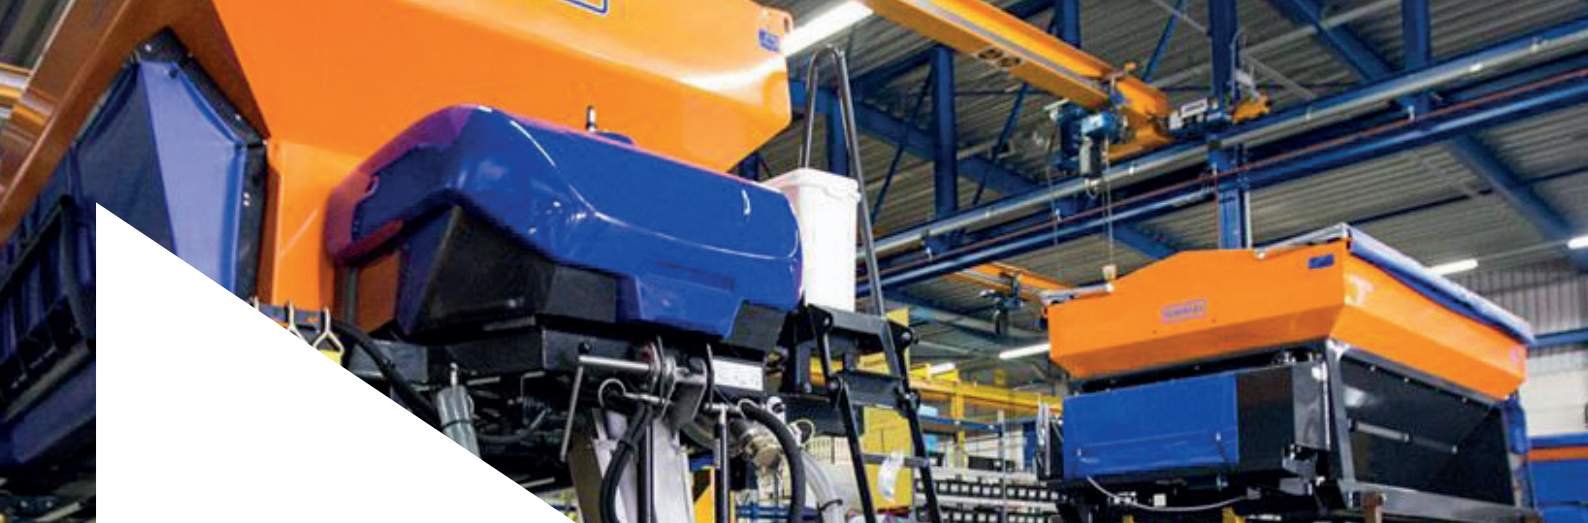

### **Bedenken jullie alles zelf of zoeken jullie de samenwerking?**

“Kennis en ervaringen delen met andere ondernemers is essentieel bij het toepassen van Smart Industry. Een goed voorbeeld daarvan is de Smart Welding Factory. Een samenwerking tussen verschillende bedrijven in Oost-Nederland die vraagstukken hebben op het gebied van lassen. Binnen Smart Welding Factory werken wij op basis van puzzelstukjes. Elke deelnemer ontwikkelt zijn eigen stukje dat weer op andere puzzelstukjes aansluit zonder dat ze van elkaar afhankelijk zijn. Een modulaire systeem dus en zo gaan we ook met programmeren om. Bij het ontwerpen van producten en het maken van robotprogramma's kan veel winst gehaald worden door vaste deel-configuraties steeds weer te hergebruiken. In plaats van het maken van een robotprogramma voor elk product afzonderlijk, ontwikkelen we nu programma's die opgebouwd worden op basis van eerder geprogrammeerde deel-configuraties. En de volgende stap is Automatisch Offline Programmeren waarbij de software in staat is zelf direct vanuit de 3D CAD tekening een robotprogramma te genereren. Het zijn praktijkvoorbeelden van Smart Industry die zijn gebaseerd op onze zoektocht naar oplossingen waarmee niet alleen wij, maar ook onze klanten zich kunnen onderscheiden en daardoor concurrerend blijven op het wereldtoneel.”

**smart  
industry**

**BOOST**

#### **Meer informatie:**

[info@smartindustryooost.nl](mailto:info@smartindustryooost.nl)

[www.smartindustryooost.nl](http://www.smartindustryooost.nl)

#boostsmart #smartindustry

LinkedIn-groep BOOST

### **BOOST geeft een boost aan Smart Industry**

Veel bedrijven in Oost-Nederland zijn actief betrokken bij Smart Industry. Zij leveren een krachtige bijdrage aan de verdere ontwikkeling en realisatie van BOOST, de regionale actieagenda voor Smart Industry in Oost-Nederland. Vijf actieve ondernemers vormen de kopgroep van BOOST. Zij zijn een kennis- en inspiratiebron voor ondernemers op het gebied van Smart Industry. Maar ook veel andere regionale bedrijven omarmen Smart Industry, zoals Aebi Schmidt uit Holten.
