# Supplementary material
Source: MDPI journal article supplement (https://www.mdpi.com/2076-3387/10/2/30)
Supplement: s1 [file s1]

**smart  
industry**

**BOOST**

*“Smart Industry is meer dan technologisch innoveren. Sociaal innoveren is ook smart”, vindt Marjolein Boezel, Financieel en HRM directeur bij Van Raam uit Varsseveld. “Als je productieprocessen sneller, beter en goedkoper wilt maken, dan kun je niet zonder je mensen op de werkvloer. Zij moeten je innovaties dragen of liever nog zélf initiëren. Voor ons gaat Smart Industry dan ook op de eerste plaats over Smart People.”*

## **“Maak je mensen medeverantwoordelijk voor innovatie”**

### **Van Raam en Smart Industry**

#### **In welke tak van sport is Van Raam actief?**

“Van Raam bestaat al sinds 1910, maar pas sinds 1933 maken we fietsframes. ‘Tuintekken met wielen’ waren dat toen, zeggen onze medewerkers nu. Wat dat betreft is er veel veranderd de afgelopen jaren. Tegenwoordig zijn we wereldmarktleider in de productie van hoogwaardige aangepaste fietsen. Niet alleen voor volwassenen en kinderen met een lichamelijke beperking, maar ook voor mensen die meer stabiliteit of zekerheid zoeken tijdens het fietsen. Met meer dan 100 medewerkers produceren we jaarlijks zo’n 6.000 fietsen op maat verdeeld over 24 modellen.”

#### **Hoe kwamen jullie in contact met Smart Industry?**

“Sinds 2000 groeien we jaarlijks zo’n 20%. Dat vraagt veel van je organisatie. Je bent continu op zoek naar manieren om die groei bij te benen. De Masterclass Smart Industry & Business Modeling, medegeorganiseerd door Oost NV, opende onze ogen en al na de eerste sessie waren we om. We zagen direct de vele mogelijkheden die er zijn om slimmer, beter, sneller en goedkoper te kunnen produceren. Niet zozeer door alles maar te automatiseren, robotiseren of digitaliseren, maar juist door met je bestaande team efficiencylagen te maken. De mens centraal, dat is echt Van Raam. Want je medewerkers kunnen een rem op innovatie zijn, maar er ook de aanjagers van zijn.”

#### **Hoe belangrijk zijn jullie medewerkers?**

“Bij Van Raam maken we onze mensen medeverantwoordelijk voor procesverbeteringen en we stimuleren hen mee te denken over slimme oplossingen. Samen stroomlijnden we het proces van intake tot productie en ook op de werkvloer zelf voerden we verbeteringen door die het werk leuker en gevarieerder maken, maar vooral sneller, beter met minder kansen op fouten tijdens het productieproces. De manier waarop we onze mensen betrekken bij innovaties werd opgemerkt door de Metaalunie. In 2015 waren we de landelijke winnaar van de Smart People Award. Naast alle andere prijzen die we de afgelopen jaren wonnen, vaak voor onze producten, zijn we er trots op dat we nu ook een prijs hebben gewonnen voor het hele team van Van Raam!”

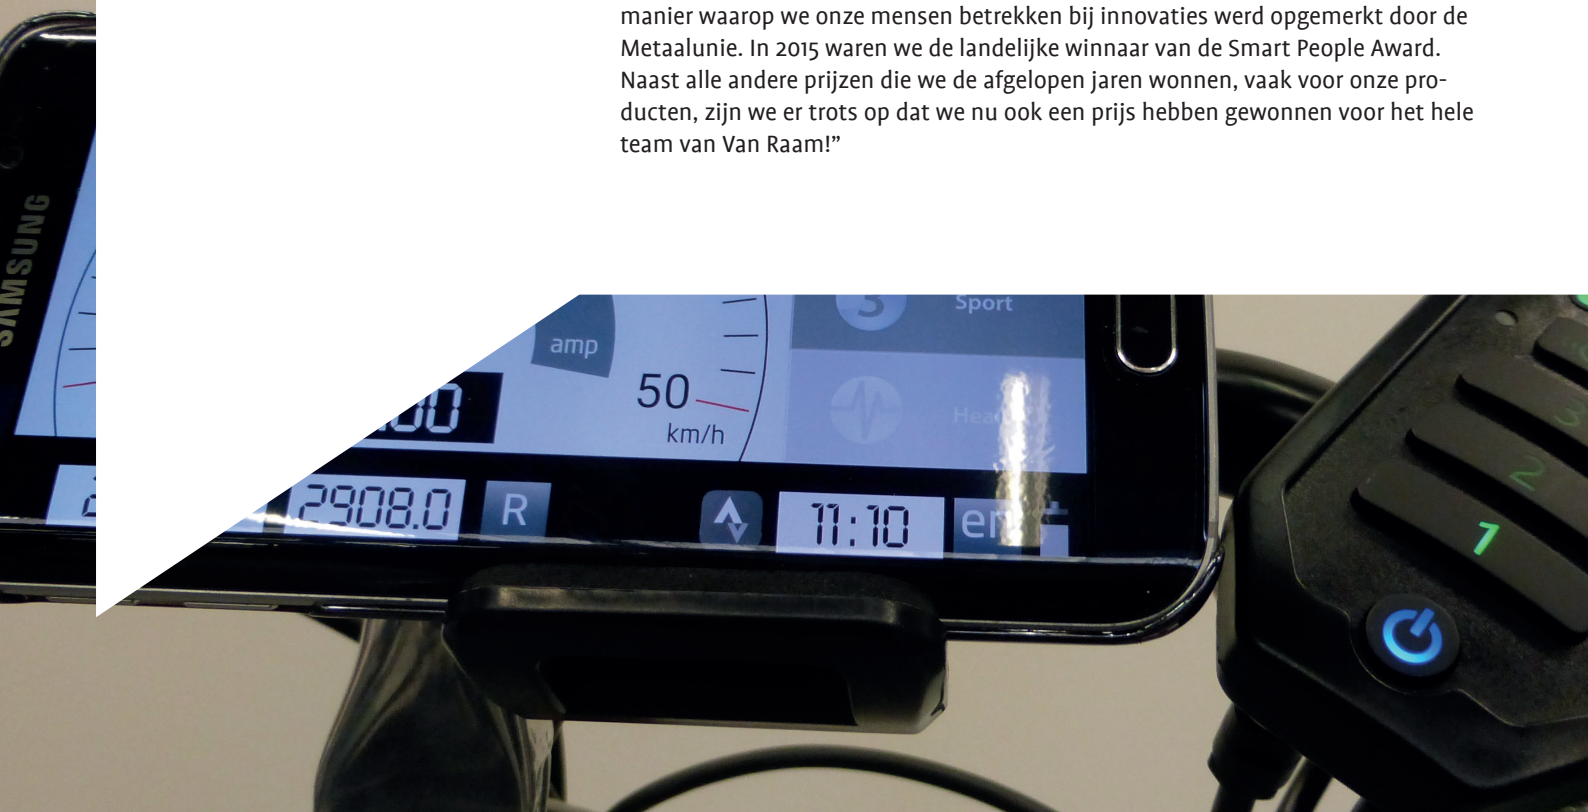

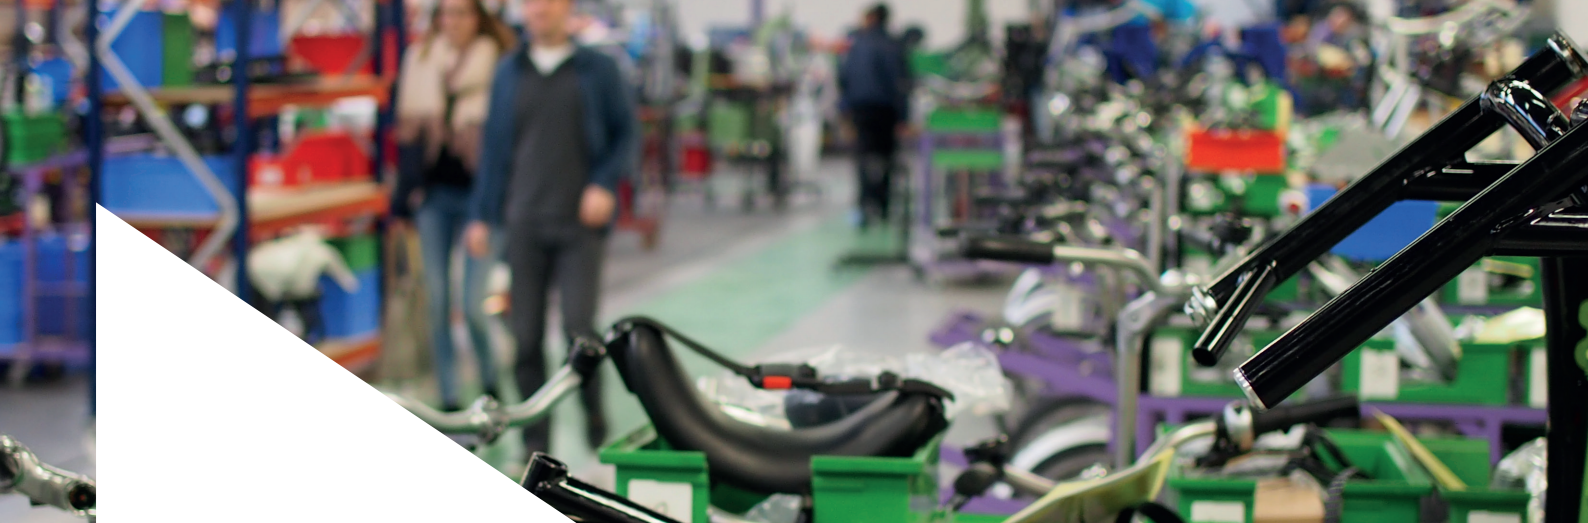

### Mensen of machines?

“Een belangrijke verandering die bij Van Raam heeft plaatsgevonden, is dat we veel meer vanuit de eindgebruiker zijn gaan denken in plaats vanuit onze dealers, die in feite onze klanten zijn. Door die vernieuwde focus ontstaan innovaties vanzelf op de werkvloer. Het productieproces is van zes weken teruggebracht naar drie weken, een enorm voordeel voor de eindgebruiker van de fiets natuurlijk. Maar we gaan verder. Klanten kunnen hun fiets al online configureren en we hebben een app ontwikkeld waarmee de gebruiker zelf de trapondersteuning kan regelen en bij problemen onderweg met één druk op de knop een noodoproep kan doen. De volgende stap is het produceren van een slimme accu die het fietsen nog eenvoudiger en comfortabeler maakt. Allemaal mogelijk gemaakt door de betrokkenheid van ons gehele team.”

### Hoe binden jullie de medewerker van de toekomst?

“Smart Industry gaat niet alleen over technologische innovaties, maar vooral ook om sociale innovatie. Goed personeel is zo belangrijk en juist daarom willen we nu al de medewerkers van de toekomst aan ons binden. In ons innovatiecentrum Inno-var voeren studenten van uiteenlopende opleidingen opdrachten uit. De studenten leren veel van elkaar en Van Raam profiteert weer van nieuwe kennis en inzichten. Op die manier worden we steeds ‘smarter’ en kunnen we onze groei ook de komende jaren in goede banen blijven leiden.”

**smart  
industry**

**BOOST**

#### Meer informatie:

[info@smartindustryoost.nl](mailto:info@smartindustryoost.nl)

[www.smartindustryoost.nl](http://www.smartindustryoost.nl)

#boostsmart #smartindustry

LinkedIn-groep BOOST

### BOOST geeft een boost aan Smart Industry

Veel bedrijven in Oost-Nederland zijn actief betrokken bij Smart Industry. Zij leveren een krachtige bijdrage aan de verdere ontwikkeling en realisatie van BOOST, de regionale actieagenda voor Smart Industry in Oost-Nederland. Vijf actieve ondernemers vormen de kopgroep van BOOST. Zij zijn een kennis- en inspiratiebron voor andere ondernemers op het gebied van Smart Industry. Marjolein Boezel van Van Raam is een van onze koplopers.
