# Supplementary material
Source: MDPI journal article supplement (https://www.mdpi.com/2076-3387/10/2/30)
Supplement: s1 [file s1]

**smart  
industry**

**BOOST**

Voor betonproducent Bruil uit Ede kwam de crisis in de bouwwereld hard aan. Maar het daagde ook uit met hightech innovaties te komen in een low-tech sector die zeer traditioneel is. “Het 3D printen van architectonisch beton is daar een prachtig voorbeeld van”, stelt Theo Voogd, manager markt & innovatie bij Bruil. “Mogelijk gemaakt door smart thinking en Smart Industry.”

## “Wij maken beton slim door slim beton te maken”

### *Bruil en Smart Industry*

#### **In welke tak van sport is Bruil actief?**

“Bruil is al meer dan 110 jaar een oer-Hollandse betonfabrikant. Maar uiteindelijk kan iedereen beton maken. Tijdens de crisis konden we daardoor eigenlijk alleen nog concurreren op prijs. Dat daagde ons uit anders te kijken naar onze producten en productieprocessen. Maar ook naar toekomstige ontwikkelingen in onze sector. De bouwketen is enorm lang. Door die in te korten is veel voordeel te behalen. Met als resultaat meer kwaliteit, minder grondstoffen en andere producten, die beter passen bij de wereld van nu en morgen.”

#### **Wat betekent Smart Industry voor jou?**

“In 2014 verzette Bruil haar koers richting de circulaire economie en Smart Industry. Ons doel is om met slimme processen en slimme producten binnen tien jaar tijd nog maar de helft van de primaire grondstoffen nodig te hebben. Dat kan door je productieproces verregaand te digitaliseren, maar ook door met innovaties te komen die echt uniek zijn in de branche. Het 3D printen van architectonisch beton is op dat gebied ons paradepaardje.”

#### **Wat levert 3D printen op?**

“De architect van tegenwoordig ontwerpt niet meer, maar programmeert. En wat is er nu makkelijker dan digitale ontwerpen rechtstreeks door te sturen naar een betonprinter die het ontwerp direct uitprint? Het proces van gereed ontwerp naar gereed product kunnen we met deze innovatie verkorten van 12 weken naar 2 uur! En al die stappen die vroeger in de keten genomen moesten worden, met alle bijbehorende faalkansen, nemen we nu weg. Bijkomend voordeel is dat je nooit meer grondstof gebruikt dan je echt nodig hebt.”

#### **Hoe verandert Smart Industry jullie branche?**

“Het 3D printen van beton biedt de nieuwe generatie architecten een wereld aan nieuwe mogelijkheden. Je kunt spelen met vormen, kleuren en structuren en je bent niet langer gebonden aan het seriematig produceren van grote volumes van hetzelfde product. Een robot maakt het niet uit of hij 10 of 100 verschillende ontwerpen achter elkaar moet produceren. De bouwwereld was vooral een gemechaniseerde industrie, dankzij Smart Industry wordt het een digitale industrie met heel veel nieuwe mogelijkheden.”

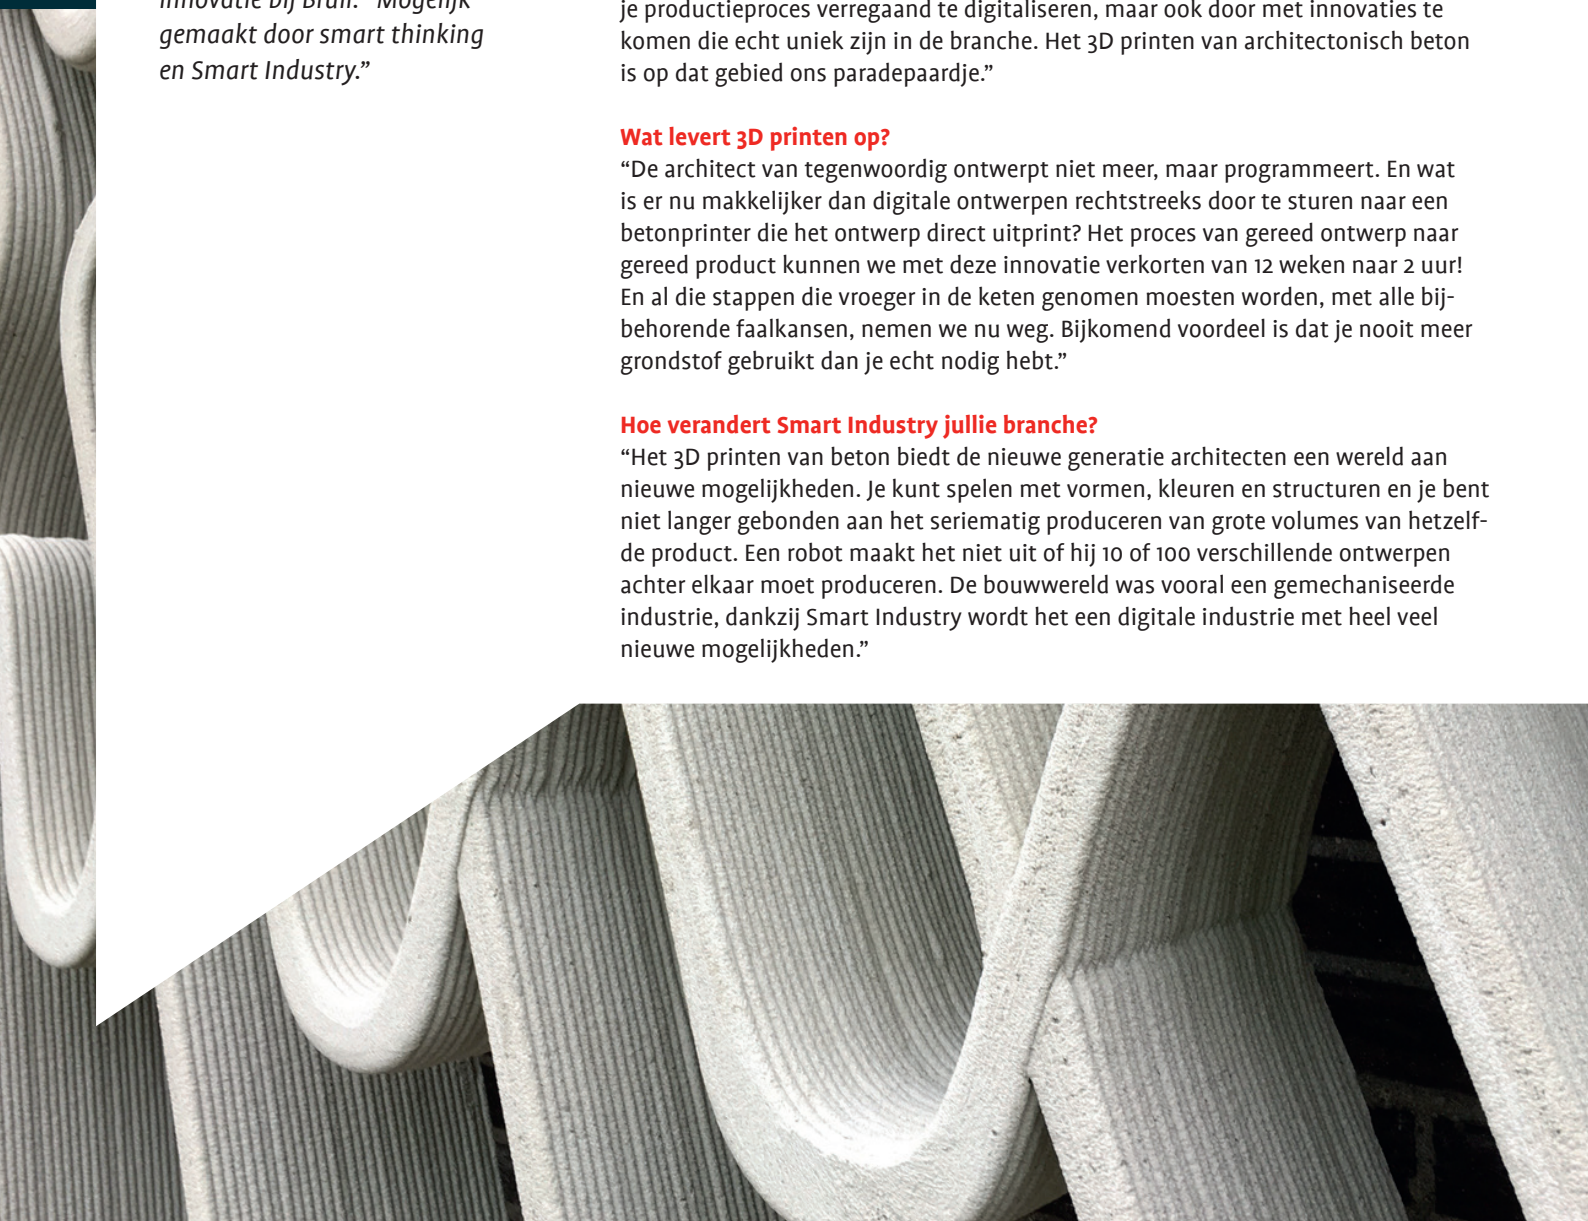

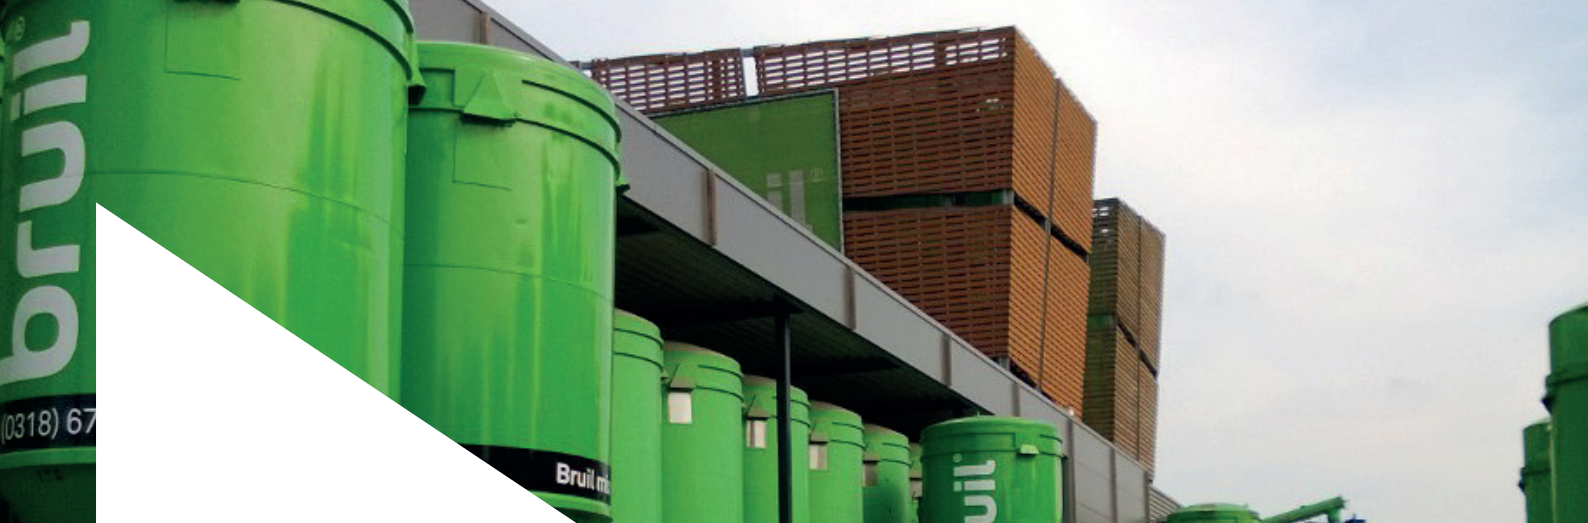

### **Slim beton, dat bestaat echt?**

“Nu onze productieprocessen steeds slimmer worden door volop gebruik te maken van slimme digitale toepassingen, kunnen we ons product zelf ook slimmer maken. Slim beton inderdaad. Nu al is het mogelijk om sensoren te verwerken in beton die in woningen of bedrijfsruimtes de temperatuur meten en regelen. Het is maar een voorbeeld van hoe Smart Technology ook onze branche enorm gaat veranderen. Bijblijven in die ontwikkelingen is voor ons heel belangrijk. We waren al een vooruitstrevend bedrijf, met Smart Technology nemen we nu echt een voorsprong.”

**smart  
industry**

**BOOST**

#### **Meer informatie:**

[info@smartindustryoost.nl](mailto:info@smartindustryoost.nl)

[www.smartindustryoost.nl](http://www.smartindustryoost.nl)

#boostsmart #smartindustry

LinkedIn-groep BOOST

### **BOOST geeft een boost aan Smart Industry**

Veel bedrijven in Oost-Nederland zijn actief betrokken bij Smart Industry. Zij leveren een krachtige bijdrage aan de verdere ontwikkeling en realisatie van BOOST, de regionale actieagenda voor Smart Industry in Oost-Nederland. Vijf actieve ondernemers vormen de kopgroep van BOOST. Zij zijn een kennis- en inspiratiebron voor andere ondernemers op het gebied van Smart Industry. Maar ook veel andere regionale bedrijven omarmen Smart Industry, zoals betonproducent Bruil uit Ede.
