# Supplementary material
Source: MDPI journal article supplement (https://www.mdpi.com/2076-3387/10/2/30)
Supplement: s1 [file s1]

**smart  
industry**

**BOOST**

*Kornelis Caps & Closures in Steenwijk produceert dagelijks bijna 2 miljoen doppen, deksels en sluitingen, voornamelijk voor foodproducten. In de nieuwe fabriek, die in 2018 volledig operationeel zal zijn, gaat de klant een belangrijke rol spelen in het productieproces, voorspelt projectleider nieuwbouw Ytsen de Boer. "Onze afnemers besturen straks de planning."*

## *"In onze nieuwe smart factory bestuurt de klant de productie"*

*Kornelis Caps & Closures en Smart Industry*

### **In welke tak van de industrie zijn jullie actief?**

"Kornelis werd opgericht in 1936. In eerste instantie maakten we producten van bakeliet. Met de komst van pvc gingen we flessen produceren en uiteindelijk richtten we ons op doppen, deksels en sluitingen, met name voor foodproducten. Je moet dan denken aan deksels voor pindakaaspotten of schepijs. Doppen voor mayonaisetubes en limonadeflessen en sluitingen voor frituurvetflessen. 50% van wat we maken is standaard, de andere helft is klant specifiek maatwerk. Met dank aan onze eigen R&D afdeling, die gespecialiseerd is in het ontwerpen van sluitingen op maat. Een mooi voorbeeld? De caps voor Voss. Dat is exclusief Noors water, verpakt in een Russische glazen fles met een Steenwijkse dop. Zo internationaal als dit product is, zijn we ook als bedrijf. Onze meeste klanten zitten in Europa, maar ook in andere werelddelen kom je onze producten tegen."

### **Hoe smart is Kornelis anno 2017?**

"Voor het maken van onze producten hoef je geen hogere wiskunde te hebben gestudeerd. Iedereen kan het. Neem wat kunststof korrels, kleurstof en additieven, verwarm dat onder hoge druk in een matrijs en je hebt een prima dop of deksel. Natuurlijk hebben we alles wat te automatiseren is, inmiddels wel geautomatiseerd. Dat stelt ons in staat om snel en goedkoop enorme aantallen caps en closures per dag te produceren. Maar daarin gaan we een forse stap verder in onze nieuwe smart factory. Die wordt nu gebouwd naast ons bestaande pand. In die fabriek draait straks alles om het volcontinu monitoren, analyseren en sturen van productiegegevens. Van alle machines worden de sensoren uitgelezen en dat levert een schat aan data op. Die kunnen we vanachter ons bureau en in de fabriek via een app uitlezen. De kleinste afwijkingen in het productieproces kunnen we meteen detecteren en daar direct op inspringen. Data verzamelen is niet zo moeilijk, maar er daadwerkelijk iets mee doen is wat ons betreft smart industry ten voeten uit."

### **Welke stappen gaan jullie nog meer zetten in de nieuwe smart factory?**

"Onze klanten kunnen straks vanachter hun eigen computerscherm rechtstreeks hun bestellingen plaatsen. Dan koppel je ineens heel veel systemen aan elkaar. Van het bestellen van grondstoffen tot het inplannen van de robots."

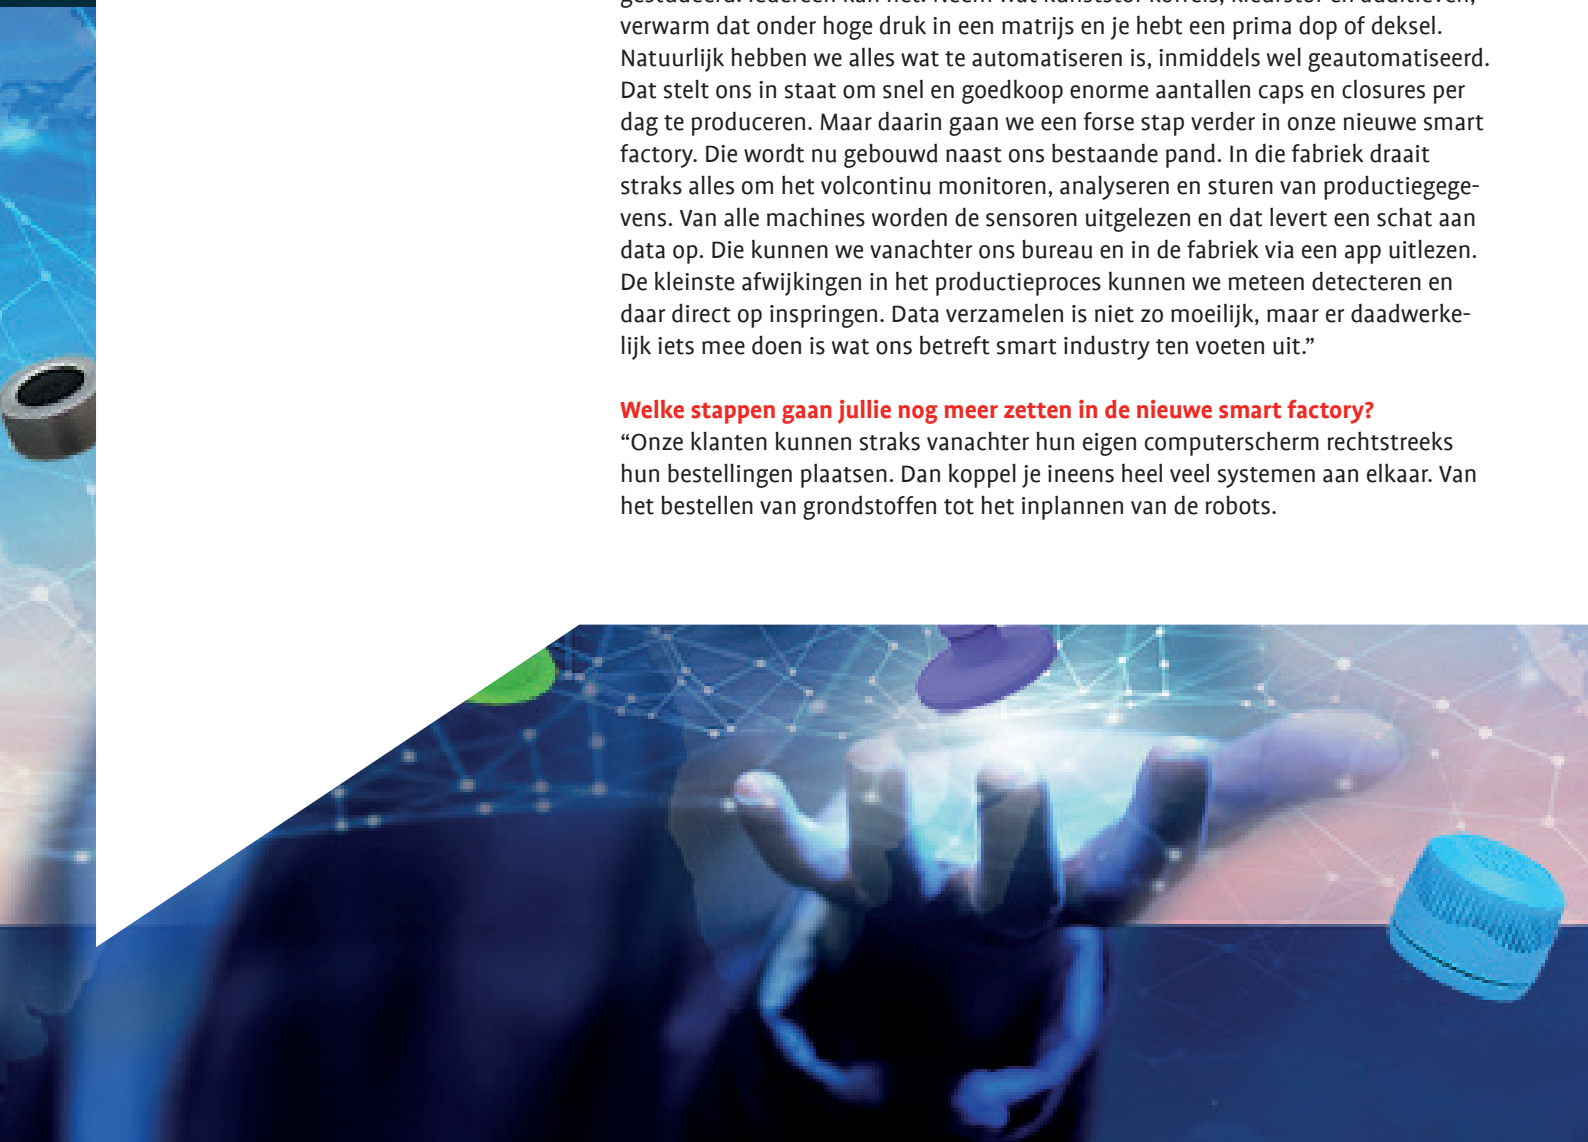

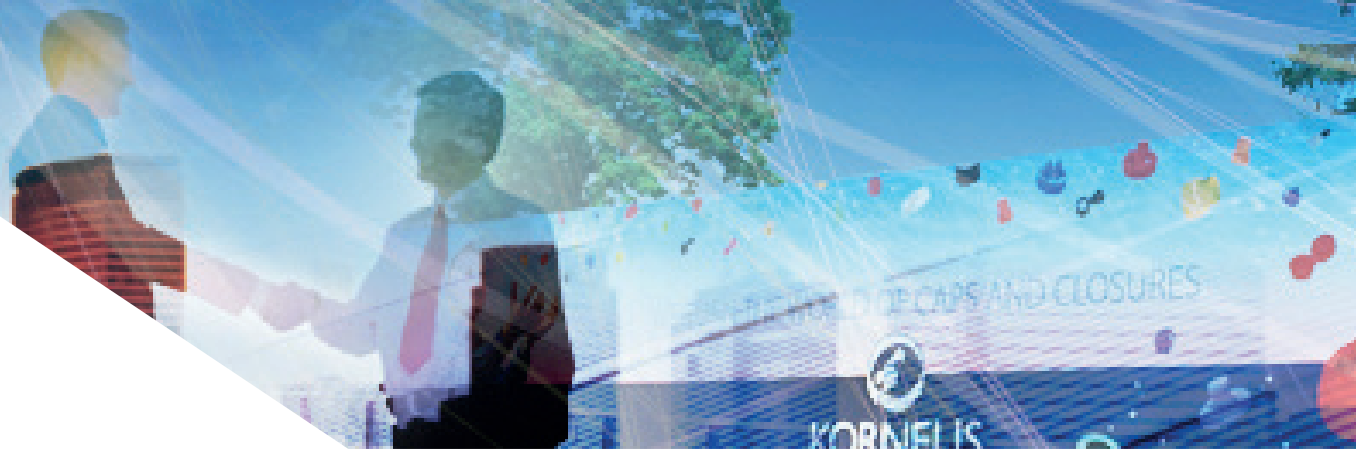

Klanten gaan zo dus ons productieproces besturen en hoe beter alle orders op elkaar zijn afgestemd, hoe beter je kunt produceren met een minimum aan downtime van je machines. Het idee dat klanten straks zelf hun orders invoeren en dat de machines vervolgens zelf de meest ideale productievolgorde bedenken, zorgt ervoor dat we zowel nieuwe als bestaande machines nog beter kunnen uitnutten. Met als uiteindelijke doel natuurlijk een nog hogere productiviteit die qua kwaliteit aan de strengste eisen van onze afnemers voldoet. Een bijkomend vraagstuk is dan wel, hoe je straks al die data die beschikbaar komen en uitgewisseld worden goed beveiligd. Een flinke uitdaging voor onze softwareontwikkelaars.”

#### **Mens of machine? Hoe kijken jullie naar de toekomst van smart industry?**

“Bij smart industry gaat het om slimme manieren van produceren. Met hightech apparatuur zoals robots. Dat doen wij al lang en dat moet ook wel om bij te blijven in een snel veranderende wereld. Maar smart industry is ook optimaal gebruik maken van je mensen. Dat is en blijft een cruciale factor. Machinebedieners moeten zich primair richten op het goed produceren van onze producten. Niet op bijzaken als het verpakken ervan. Je moet je medewerkers vooral laten doen waar hun kwaliteiten liggen en wat goed is voor het product dat we maken. Daar moet je focus op liggen. De focus bij Kornelis ligt in de toekomst vooral op smart business. Het snel en foutloos fabriceren van standaard- en maatwerkproducten, volgens de eisen en specificaties die klanten zelf aanleveren. In onze nieuwe smart factory kunnen we die stap straks zetten.”

**smart  
industry**

**BOOST**

#### **Meer informatie:**

[info@smartindustryooost.nl](mailto:info@smartindustryooost.nl)

[www.smartindustryooost.nl](http://www.smartindustryooost.nl)

#boostsmart #smartindustry

LinkedIn-groep BOOST

#### **BOOST geeft een boost aan Smart Industry**

Veel bedrijven in Oost-Nederland zijn actief betrokken bij Smart Industry. Zij leveren een krachtige bijdrage aan de verdere ontwikkeling en realisatie van BOOST, de regionale actieagenda voor Smart Industry in Oost-Nederland. Vijf actieve ondernemers vormen de kopgroep van BOOST. Zij zijn een kennis- en inspiratiebron voor andere ondernemers op het gebied van Smart Industry. Maar ook veel andere regionale bedrijven omarmen Smart Industry, zoals Kornelis Caps & Closures uit Steenwijk.
