# Supplementary material
Source: MDPI journal article supplement (https://www.mdpi.com/2076-3387/10/2/30)
Supplement: s1 [file s1]

# smart industry

## BOOST

*Bij Itter in Hardenberg zijn ze niet bang dat robotisering, automatisering en digitalisering banen gaat kosten. Juist het tegenovergestelde is waar, volgens oprichter Henk Wiersma. De snelle technologische ontwikkelingen in de maakindustrie gaan juist banen opleveren, voorspelt de ambassadeur van Smart Industry in Oost-Nederland. En die filosofie deelt ook zoon Frank, die sinds eind vorig het bedrijf heeft overgenomen.*

## *“Elke baan in de maakindustrie creëert ergens anders weer twee nieuwe.”*

### *Itter en Smart Industry*

#### **In welke tak van de maakindustrie onderscheidt Itter zich?**

“Itter is dé specialist in het frezen van aluminium onderdelen. Dat doen we voor opdrachtgevers zoals Océ Canon, ASML en VMI. Aansprekende multinationals, die net als wij de beste willen zijn in wat ze doen. We hebben in 2000 bewust gekozen voor specialisatie, omdat je daarmee echt waarde kunt toevoegen voor je klanten. Innovatie staat voorop en dat zie je terug in onze ‘fabriek van de toekomst’ waar duurzaamheid, innovatie en een energieneutrale productie centraal staan”

#### **Wat doet Itter concreet met Smart Industry?**

“Ik word al mijn hele leven geboeid door nieuwe technologieën. Niet alleen als het gaat om innovaties in de metaalbranche, maar eigenlijk op elk gebied. Die voorliefde voor vooruitgang brengen we in de praktijk in onze smart factory. Daar streven we in een uitiem duurzaam gebouw naar mens-arme productie en een energieneutraal productieproces. We maken volop gebruik van duurzame energieoplossingen en investeren fors in hightech machines. Maar wel met een visie. Automatiseren is een middel en geen doel. Bij Itter is Smart Industry een filosofie die verder gaat dan alleen slim produceren. Je moet slimmer omgaan met je hele bedrijf. Met je klanten en leveranciers, met je materialen en machines en met je personeel natuurlijk. Want niet iedereen kan of wil mee met de snelheid waarmee technologie in onze branche zich ontwikkelt. Daar moet je oog voor hebben als werkgever.”

#### **Mens-arm produceren, dat klinkt als heel veel personeel op straat?**

“Ook bij Itter zijn robots de nieuwe collega's. Want alleen door te automatiseren ben je in staat om goedkoper te produceren en zo de productie in Nederland te houden. Dat kost dus enerzijds banen, maar tegelijkertijd creëert elke baan in de maakindustrie weer twee nieuwe banen. Ook in andere sectoren. Als wij meer kunnen produceren, zul je ook meer transporteurs nodig hebben. En dus weer meer goede wegen, etc. etc. Maar kijk ook naar de banen die er komen voor hbo'ers en mbo'ers die al die innovatieve systemen moeten bedenken. Het is hun uitdaging om dingen te ontwerpen die uitermate smart zijn, maar voor de gebruiker heel eenvoudig te bedienen. Kijk naar de ontwikkeling van de smartphone. Dat is een wonder van techniek, bedacht door een compleet nieuwe generatie hooggeschoolde technici. Met als resultaat producten waar echt iedereen mee overweg kan, van een

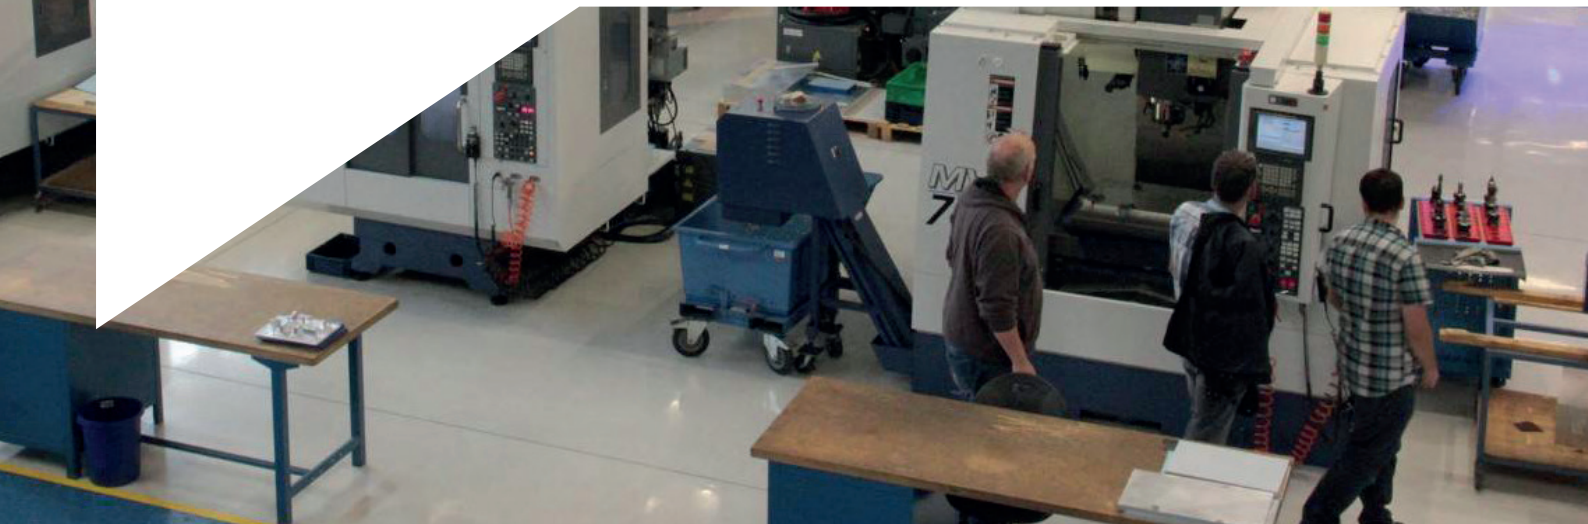

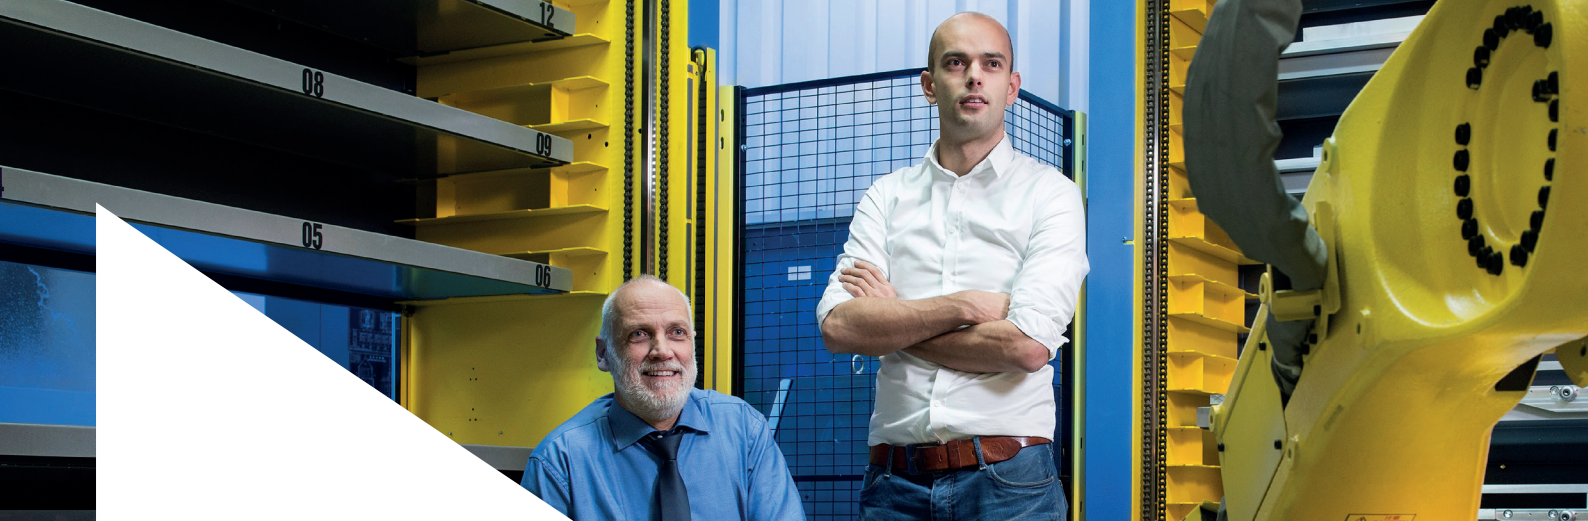

peuter tot een 80-jarige digibeet. En zo is het bij Itter ook. Steeds meer van ons werk wordt gedaan door hoger opgeleid personeel. Sinds wij de stap naar smart hebben gemaakt, is ons personeelsbestand eigenlijk alleen maar gegroeid.”

#### **Waar staat Itter over 10 jaar en hoe smart zijn jullie dan?**

“Mensen noemen mij een dromer. Ik kan enorm fantaseren over de toekomst. Maar als ik nu terugdenk aan waar ik 10 jaar geleden over ‘droomde’, dan is veel daarvan ook echt uitgekomen. Maar dan veel sneller dan ik vooraf had kunnen voorspellen. Ik voorzie een wereld waarin techniek de mens echt dient. Dat je bijvoorbeeld op je smartphone insprekt dat je naar Hilversum wil en dat er dan binnen een kwartier een auto voorrijdt, die je zonder chauffeur snel en veilig naar je bestemming brengt. Dat lijkt u nog science fiction, maar ik geloof daar echt in. Zo zullen we bij Itter steeds verder mens-arm gaan produceren. Tot nu zijn onbemande productiestraten vooral gericht op grootserie-fabricage en niet op enkelstuks productie. Wij zijn echter al verder en kunnen nu al een rendabele one-piece-flow realiseren. Ik zie onze klanten straks ons productieproces aansturen vanachter hun computer. En ik zie AGV's (automatic guided vehicles) rondrijden in een compleet mens-arme fabriek. Daarover zijn we nu in gesprek met een Canadese leverancier. Ik zeg nu over 10 jaar, maar waarschijnlijk zijn we in minder dan 5 jaar al zo ver.”

**smart  
industry**

**BOOST**

#### **Meer informatie:**

[info@smartindustryooost.nl](mailto:info@smartindustryooost.nl)

[www.smartindustryooost.nl](http://www.smartindustryooost.nl)

#boostsmart #smartindustry

LinkedIn-groep BOOST

#### **BOOST geeft een boost aan Smart Industry**

Veel bedrijven in Oost-Nederland zijn actief betrokken bij Smart Industry. Zij leveren een krachtige bijdrage aan de verdere ontwikkeling en realisatie van BOOST, de regionale actieagenda voor Smart Industry in Oost-Nederland. Vijf actieve ondernemers vormen de kopgroep van BOOST. Zij zijn een kennis- en inspiratiebron voor ondernemers op het gebied van Smart Industry. Maar ook veel andere regionale bedrijven omarmen Smart Industry, zoals Itter uit Hardenberg.
